# Supplementary material
Source: MDPI journal article supplement (https://www.mdpi.com/2073-4336/12/2/44)
Supplement: s1 [file s1]

# **ReadMe file to reproduce data analysis in “Gender Differences in Repeated Dishonest Behavior: Experimental Evidence”**

Subhasish M. Chowdhury, Joo Young Jeon, Chulyoung Kim, and Sang-Hyun Kim

## **Source of the data**

The data is primary data and was collected by the authors using lab experiments conducted at the Yonsei University, Seoul, Republic of Korea.

## **Description of the experiment**

The description, experimental instructions, questionnaire etc. are included in the paper appendix.

## **The data can be cited as:**

Chowdhury, S.M., Jeon, J., Kim, C., & Kim, S. (2021). Data for: “Gender Differences in Repeated Dishonest Behavior: Experimental Evidence”. Games, MDPI.

## **Data files**

The entire raw data is available in Stata format in the file titled Games-final.dta

The code used to generate the results in the paper is available in the Stata do file: Games-final.do
